# Supplementary material
Source: Royal Society of Chemistry journal article supplement (doi:10.1039/d6nr01170e)
Supplement: d6nr01170e1.pdf [file d6nr01170e1.pdf]

## Supplementary Information for

# Electroreduction of Carbon Dioxide (CO<sub>2</sub>) at Oxalate and Polypyrrole Modified Copper Surfaces

Minyoung Kim,<sup>a</sup> Meredith Zannacker,<sup>b</sup> Yuxuan Zhang,<sup>a</sup> Reilly Eiyneck,<sup>b</sup> Reese Resheske,<sup>b</sup>

Donghun Lee,<sup>a</sup> Ella Mack,<sup>b</sup> Elijah Behnke,<sup>b</sup> Sunghwan Lee<sup>a\*</sup> and Sujat Sen<sup>b\*</sup>

<sup>a</sup>School of Engineering Technology, Purdue University, West Lafayette, IN, 47907, USA

<sup>b</sup>Department of Chemistry & Biochemistry, University of Wisconsin-Lacrosse, Lacrosse, WI, 54601, USA

E-mail: [ssen@uwlax.edu](mailto:ssen@uwlax.edu) and [sunghlee@purdue.edu](mailto:sunghlee@purdue.edu)

This file includes:

- *S.1. Preparation of gas diffusion electrodes*
- *S.2. Electrochemical cell Design & Electrolysis experiments*
- *S.3. Experimental details of oxalate and polypyrrole deposition*
- *S.4. Characterization of polypyrrole on copper-based GDL*
- *S.5. Density Functional Theory (DFT) studies*
- *Figures S1-S21*
- *Tables S1-S5*

### **S.1. Preparation of gas diffusion electrodes**

PTFE-based TE35 filter discs with 0.2  $\mu\text{m}$  pore size, 47 mm diameters, and a polypropylene (PP) support ring on one side (Whatman, Sigma Aldrich) were used as the GDL, hereon referred to as “TE35” substrates. The TE35 substrates were modified with catalyst and used as the foundation for all GDEs in this study and optical images of the same are shown in Fig. S1. Nominal thickness of these substrates was determined to be  $254 \pm 5 \mu\text{m}$ , (Mitutoyo Model#7326A) as purchased from the manufacturer. The Teflon side of the GDL was coated with catalyst particles by thermal evaporation. Copper (Cu) thin films were evaporated onto glass, Si, and Teflon/GDL substrates to a thickness ranging 100-1000 nm at a working pressure of  $2 \times 10^{-3}$  Torr. Prior to the depositions, the evaporator chamber was pumped down to a base pressure of  $\sim 5 \times 10^{-6}$  Torr or below. The thickness of the films was monitored in-situ through quartz crystal microbalance with a gold-coated crystal and validated ex-situ using an FS-1 multiwavelength ellipsometer (FilmSense). The sheet resistance of deposited Cu films was measured using a custom-built four-point probe with a precision multimeter (Keithley 2000).

### **S.2. Electrochemical cell Design & Electrolysis experiments**

The flow fields, which also serve as current collectors, were machined from 3.18 mm thick impregnated graphite (G347B, MWI, Inc.) with 12 mm  $\times$  1 mm rectangular slots for inlet and outlet gas flow such that all the reactants are forced through the porous electrode in a flow-through configuration. The GDEs were sealed into the cell using gaskets cut from 1/16 in. thick, 60A durometer hardness, butyl rubber sheets (McMaster-Carr). The entire cell was assembled and tightened using a torque screwdriver (Mountz Inc.) with a torque of 14 – 16  $\text{lb}_f\text{-in}$  (1.6 – 1.8 N-m). To ensure accuracy, before every experiment, the potential of the Ag/AgCl reference

electrode was measured against a saturated calomel electrode (Fisher Scientific, nominally +242 mV vs. SHE) dedicated for calibration and not for experiments that could compromise its integrity. The difference in potential was always within  $\pm 20$  mV of the expected value. The exact value within that 20 mV range was not recorded and contributes to the experimental uncertainty in all reported electrode potentials. For comparison with other reporting scales, the Ag/AgCl electrode potentials can be converted to the reversible hydrogen electrode (RHE) scale, within  $\pm 20$  mV accuracy, via the following equation:  $E(\text{RHE}) = E(\text{Ag/AgCl}) + 0.210 + 0.0591 \times \text{pH}$ . In this study, the electrolyte used was 1M  $\text{KHCO}_3$  (99.999%, Sigma Aldrich, Trace Metal impurities < 10 ppm) dissolved in deionized water (Type 1, filtered to 18.2  $\text{M}\Omega\cdot\text{cm}$  using Gen Pure Water purifier, ThermoScientific). Saturated with  $\text{CO}_2$ , this electrolyte had a pH of 7.6 and this is assumed to be constant through the course of the electrolysis. Reported potentials can be inter-converted between the SHE, Ag/AgCl or RHE scales based on this conversion.

During electrolysis operation,  $\text{CO}_2$  (99.99%, Research Grade 5.0, Mississippi Welders Supply Company, MWSCO) was delivered to the cathode at a constant flow rate of 20  $\text{mL min}^{-1}$  using mass flow controllers (Alicat Scientific). The  $\text{CO}_2$  stream were supplied to the MFCs directly from the tank without any hydration. An aqueous electrolyte solution of 1M  $\text{KHCO}_3$  (99.999%, Sigma Aldrich, Trace Metal impurities < 10 ppm) dissolved in deionized water (Type 1, filtered to 18.2  $\text{M}\Omega\cdot\text{cm}$  using Gen Pure Water purifier, ThermoScientific) was used as both catholyte and anolyte and pre-saturated with a secondary stream of 20  $\text{ccm CO}_2$  before it was passed through the cell using a peristaltic pump (Masterflex L/S Series) at a constant volumetric flow rate of 1  $\text{mL min}^{-1}$ . On the catholyte stream, a single pass configuration was used to minimize product crossover and loss due to oxidation at the anode. The anolyte stream was recirculated for the duration of the experiment. Silicone tubing (Masterflex, L/S 14) was used inside the pump head,

while perfluoroalkoxy alkane (PFA) tubing (Swagelok) connected the pump head, reservoir, and flow cell together. All tubing connections were coupled together with PFA or stainless-steel compression fittings (Swagelok). Experiments were performed at room temperature with no temperature measurement and controls were not included within the cell. Gaseous products in the effluent gas stream were collected from two sources, which included the CO<sub>2</sub> stream existing the cathodic half-cell as well as the secondary CO<sub>2</sub> stream existing the catholyte reservoir. These gas streams were injected one at a time via a 6-way valve (Swagelok, SS-43Y6FS2) into the automated sample loop of a gas chromatograph (GC, SRI Instruments MG#4). Before each electrolysis run, the sample was treated to a pre-reduction by application of  $-5 \text{ mA/cm}^2$  for 1 hour to ensure the conversion of any oxidized species to metallic copper. The electrolyte samples generated during the pre-reduction step were analyzed and were not found to contain any appreciable products. Regardless, to ensure no contamination and eliminate the possibility of the oxalate contributing to eCO<sub>2</sub>RR, a fresh electrolyte was introduced thereafter for each test.

### **S.3. Experimental details of oxalate and polypyrrole deposition**

For copper oxalate deposition, a typical deposition bath of 25 mL consisted of 0.3M oxalic acid in Type-1 deionized (DI, Resistivity  $\sim 18.2 \text{ MOhm.cm}$ ) water circulating through the cell at 1 mL/min using a peristaltic pump. Preliminary tests conducted without flowing electrolyte revealed heterogeneous and patchy depositions suggesting localized effects, which were largely absent after flow was introduced. Additionally, the presence of O<sub>2</sub> (from air) was found necessary for the deposition of a uniform oxalate film, and initial trials conducted with continuous N<sub>2</sub> purging failed to produce stable films. A pristine Cu-coated TE35 substrate was used as the working electrode, a Platinum sheet was the counter electrode and a freshly

calibrated Ag/AgCl (+0.210 V vs. SCE) was used as the reference electrode. All electrochemical experiments were conducted using a VSP-300 Multichannel potentiostat (Bio-logic) in a three-electrode configuration. Cyclic voltammetry between -0.3V to +0.4V vs. Ag/AgCl<sup>1</sup> was used to generate thin films of copper oxalate on the surface of the thermally evaporated metallic copper and variations were explored with respect to both number of cycles and scan rate.

Electrodeposition of pyrrole was conducted in the same single compartment flow cell, immediately following the oxalate deposition. A typical deposition bath for pPy deposition consisted of 0.3M oxalic acid and 0.1M freshly distilled pyrrole (colorless) dissolved in DI water. Deposition was conducted using a constant applied potential of 0.9V vs. Ag/AgCl for varying durations of time to obtain a target charge (coulombs passed) which ranged from a thin sample (0.25C), medium thickness (2C), and very thick deposition (10C).

#### **S.4. Characterization of polypyrrole on copper-based GDL**

Using the oxalate modified films, pPy was successfully grown by applying a constant potential above 0.7 V (vs. Ag/AgCl) which was found to be a minimum threshold for the oxidative polymerization of pyrrole, consistent with prior literature reports.<sup>1</sup> The passivated copper oxalate coated Cu/TE35 substrates (3 cycles) were used as the working electrode and electropolymerization of the monomer was conducted in the same electrolyte used for the oxalate deposition. pPy films were successfully grown at a constant applied voltage of 0.9V (vs. Ag/AgCl) in this study and a sample chronoamperogram is shown in Fig. S9. The charge passed during the deposition was used to control the approximate thickness of the pPy layer on top of the copper oxalate sub-layer. Fig. 2(d) shows a photograph which indicates complete and uniform coverage of the sample with a black-color pPy film such that the underlying copper or

copper oxalate are no longer visible. Fig. 2 also displays magnified SEM images, showing more densely compacted spherical structures compared to that of oxalate-coated counterparts, again consistent with prior literature reports.<sup>1,2</sup>

The structural integrity of the underlying catalyst after polymer deposition was further verified via XRD analysis (Fig. 2(m)). The diffraction pattern of the CuOA3\_pPy2 sample retains the distinct peaks corresponding to copper oxalate ( $\text{CuC}_2\text{O}_4$ ) and metallic copper, with slightly reduced peak intensity, suggesting that electropolymerization process did not induce significant phase decomposition of the underlying copper and copper oxalate layer, even though a portion of the copper oxalate phase might have been partially consumed or lost its crystallinity. This confirms that the electropolymerization process did not induce any phase decomposition or structural degradation of the underlying copper and copper oxalate layer. To further confirm the successful deposition of pPy and the preservation of the layers beneath, cross-sectional FIB-SEM and FTIR analyses were conducted. FIB-SEM images (Fig. S7) clearly revealed a distinct three-layered structure consisting of evaporated Cu, copper oxalate, and the pPy overlayer. Furthermore, FTIR spectra (Fig. S8) confirmed the coexistence of vibrational peaks characteristic of both copper oxalate and polymerized pPy, verifying that the oxalate layer was structurally preserved beneath the polymer coating.

In Fig. S17, the as-prepared CuOA3\_pPy0.25 shows predominantly positively charged nitrogen's, the sum of C-N<sup>+</sup> and C=N<sup>+</sup> occupying 62.65% of the total area, consistent with p-doped pPy. After the electrolysis, the summed fraction of polaron and bipolaron drops to 19.66%, while the neutral pyrrolic NH-Py at 399.84 eV increased to 48.18% from 37.35% in as-prepared sample and a new component at 398.29 eV (32.16%) emerged, assignable to

imine-like/pyridinic nitrogen (C=N) and possibly interfacial Cu–N coordination (Fig. S19a). The decrease in positively charged nitrogen indicates reduction and de-doping of charged pPy under reducing eCO<sub>2</sub>RR environment. Upon slight surface etching of the post-electrolysis film, the C=N signal decreases to 23.79% and the NH-Py peak increases to 54.08%, indicating a depth-graded doping profile from the electrolyte-polymer interface toward polymer-catalyst interface. The outermost layer is imine-enriched owing to cathodic de-doping and counter-anion expulsion, often accompanied by densification to a less-porous morphology,<sup>3,4</sup> potentially reinforced by local OH<sup>-</sup> accumulation during the eCO<sub>2</sub>RR.<sup>5,6</sup> In contrast, the subsurface retains a higher fraction of doped N centers, thereby maintaining its electrical conductivity. Such a barrier surface–conductive sublayer architecture can secure electronic transport to the underlying Cu-based catalysts while limiting ion permeation through the denser, less conductive outer skin.<sup>7</sup>

### **S.5. Density Functional Theory (DFT) studies**

First-principles calculations were carried out using density functional theory (DFT) as implemented in the Vienna Ab initio Simulation Package (VASP). The generalized gradient approximation (GGA) with the Perdew–Burke–Ernzerhof (PBE) functional was employed to describe the exchange–correlation interactions. To better account for weak van der Waals interactions, the D3 dispersion correction with the Grimme scheme was applied. An energy cutoff of 600 eV and a Monkhorst-Pack k-mesh of  $2 \times 2 \times 1$  were employed to sample the Brillouin zones of the crystals, both with and without the adsorption. The adsorption energy ( $E_{\text{ads}}$ ) was calculated from the energy differences between the adsorbent on the substrate surface ( $E_{\text{total}}$ ) and the sum of the energy of the substrate crystal ( $E_{\text{sub}}$ ) and the total energy of the adsorbate ( $E_{\text{adsorbate}}$ ), defined as  $E_{\text{ads}} = E_{\text{total}} - (E_{\text{sub}} + E_{\text{adsorbate}})$ . A vacuum layer of approximately 15 Å was

applied to prevent interactions between adjacent slabs. For all calculations, the criterion for the electronic self-consistent field loop was set to  $1 \times 10^{-5}$  eV per atom. Atomic structures were optimized until the residual forces were below  $0.05 \text{ eV \AA}^{-1}$ . We focused on distinguishing our (a) CuOA 3 oxalate-derived catalyst which has  $\sim 77\%$   $\text{Cu}^+$  per XPS data from (b) cuprite surface ( $\text{Cu}_2\text{O}$ ) which is by definition  $100\%$   $\text{Cu}^+$ . Since  $\text{Cu}^+$  was the dominant species for both these systems, and they share the same underlying crystal structure, the Cu:O stoichiometry of the two models was adjusted according to the XPS results (Table S4). In order to create the oxalate-derived surface, we used the pristine cuprite  $\text{Cu}_2\text{O}$  model and modified its local coordination and electronic environment by using the experimentally determined ratio between  $\text{Cu}^0$  and  $\text{Cu}^+$  species. This treatment enables the two structures to be distinguished in terms of their surface electronic structure and local coordination characteristics.

For the adsorption configuration, the atop adsorption geometry was adopted as the initial model, which is commonly observed for carbonyl-containing intermediates on metal oxide surfaces due to its favorable orbital interaction with surface Cu sites. The adsorption energy was calculated using the following expression:

$$E_{ads} = E_{total} - (E_{sub} + E_{adsorbate})$$

where  $E_{total}$ ,  $E_{sub}$ , and  $E_{adsorbate}$  represent the total energies of the adsorbate–surface complex, the clean surface, and the isolated adsorbate, respectively. Furthermore, the optimized adsorption configurations of related reaction intermediates, including  $\text{CH}_3\text{CO}^*$ ,  $\text{CH}_3\text{CHO}^*$ ,  $\text{CH}_3\text{CH}_2\text{O}^*$ , and  $\text{CH}_3\text{COCHO}^*$ , on both cuprite  $\text{Cu}_2\text{O}$  and oxalate-derived surfaces were studied as shown in Fig. S20. These were subsequently used for the reaction energy barrier analysis as described below.

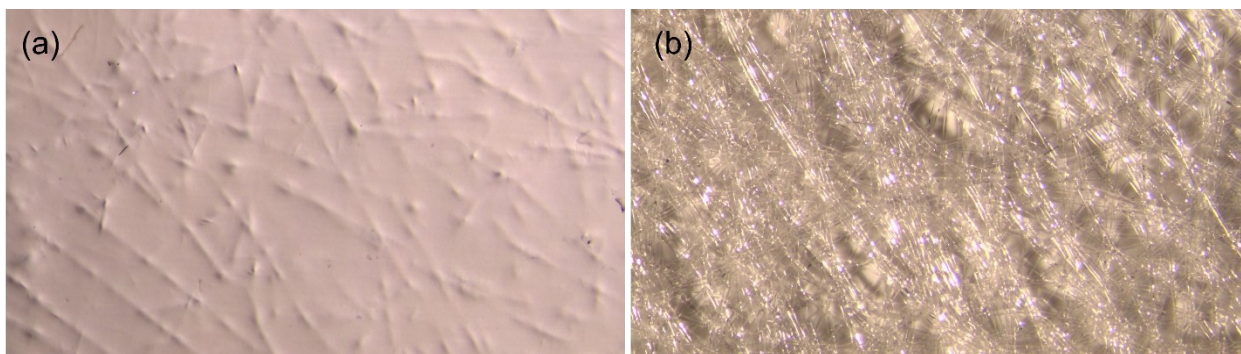

**Figure S1.** Photographs of (a) front side of the TE35 substrate as purchased, and (b) back side of the TE35 substrate as purchased.

Figure S1. shows optical images of the commercially available TE35 substrate used in this study. Optical inspection of this pristine substrate reveals a fabric-like inter-woven fiber matrix structure on one side (polypropylene support ring as per manufacturer) and the other side to be a relatively smoother Teflon film with no visible structure. This mimics the bilayer structure of conventional substrates such as the carbon-based gas diffusion layers (GDL) used in fuel cells.

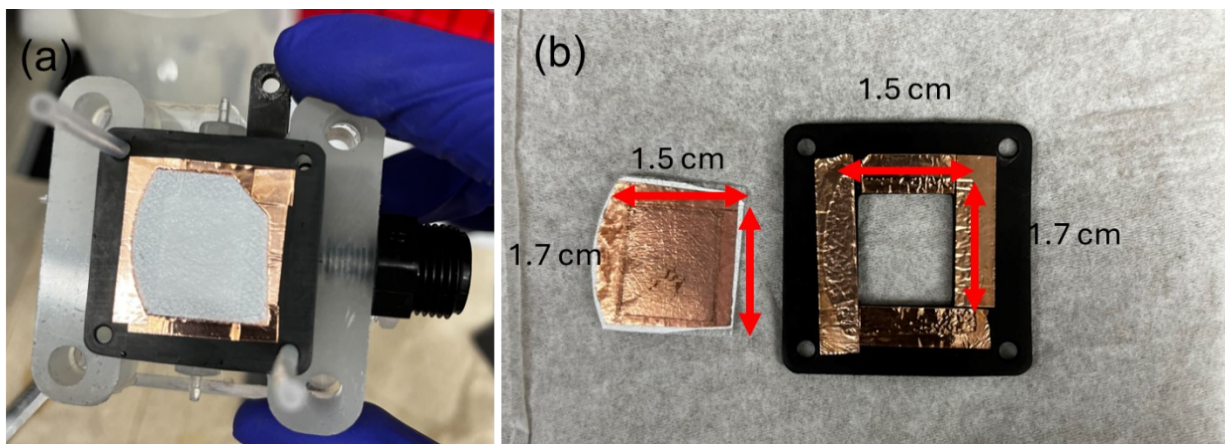

**Figure S2.** Photographs demonstrating how copper tape was used to make electrical contact with the front of the catalyst surface and current collector placed on the back.

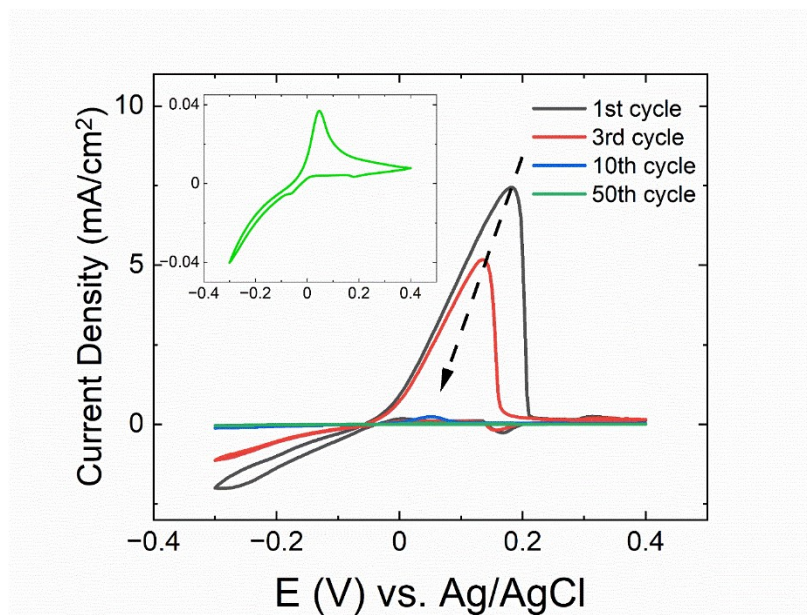

**Figure S3.** Cyclic voltammogram of Cu/TE35 at 1 mV/s between -0.3V and +0.4V vs. Ag/AgCl for a total of 50 cycles. Electrolytes used was 0.3M aqueous oxalic acid solution flowing constantly at 1 mL/min; inset shows the last cycle in more detail.

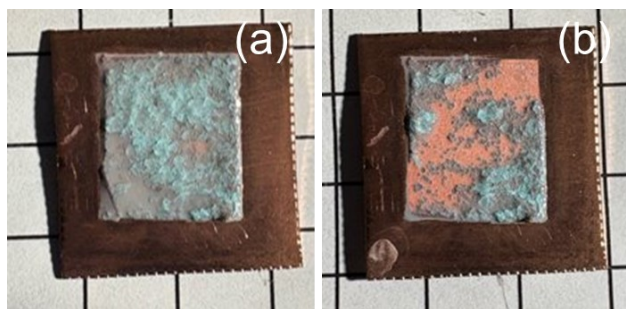

**Figure S4.** *Photographs of oxalate deposition on commercially available planar copper substrates (McMaster Carr) (a) immediately after deposition and (b) after gently rinsing with a stream of DI water. Deposits were found to be non-uniform and weakly adherent which came off during post-deposition rinsing.*

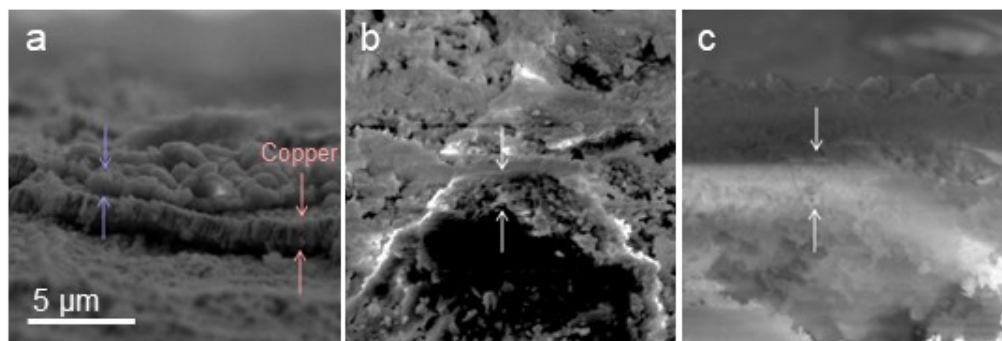

**Figure S5.** Cross-sectional SEM images of (a) CuOA 3, (b) CuOA 10, and (c) CuOA 50.

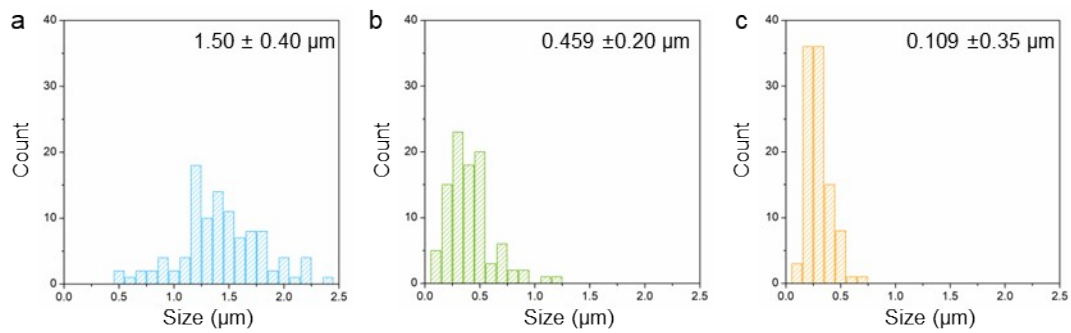

**Figure S6.** Particle size distribution histograms obtained from top-view SEM images of (a) CuOA 3, (b) CuOA 10, and (c) CuOA 50.

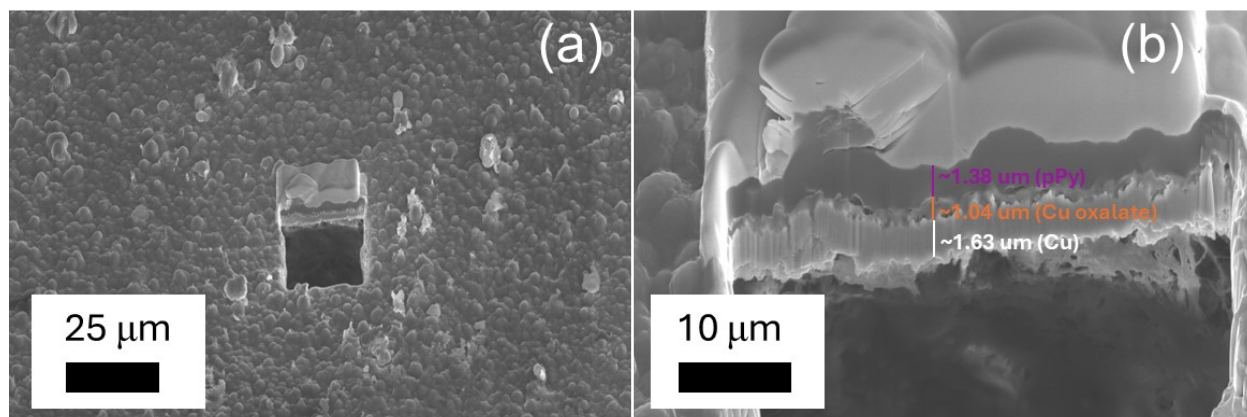

**Figure S7.** FIB-SEM image of CuOA3\_pPy2 sample that exhibits distinct layers of the Teflon substrate, copper metal layer, copper oxalate layer and polypyrrole coating on top. The Etching was capped by a protective Platinum layer deposited to minimize beam damage. The FIB-cut edge exhibited distinct three-layered structure with clear interfaces, consisting of evaporated Cu (1.63 μm), copper oxalate (1.04 μm), and pPy layer (1.38 μm).

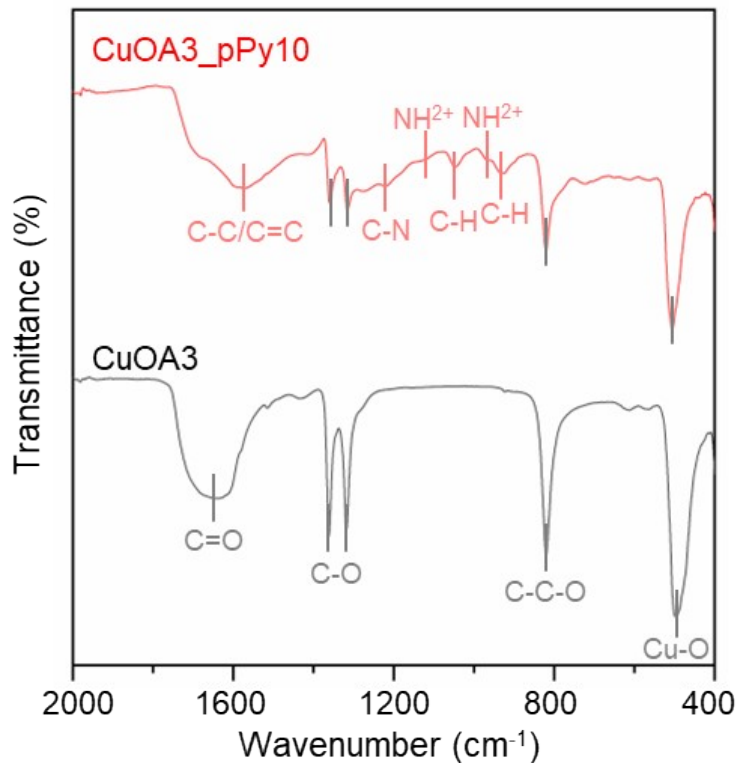

**Figure S8.** FTIR spectra of CuOA 3 and CuOA3\_pPy10 exhibiting unique bond stretches that identify the presence of oxalate and polypyrrole respectively.

Data was collected using an ATR accessory on a Thermo Nicolet S50 instrument and bond stretches marked were identified on the basis of prior literature.<sup>8-12</sup> The CuOA3 exhibited clear peaks representing Cu-O ( $493\text{ cm}^{-1}$ ), C-C-O ( $821\text{ cm}^{-1}$ ), C-O ( $1318$  and  $1361\text{ cm}^{-1}$ ), and C=O ( $1647\text{ cm}^{-1}$ ) stretching/bending, which are typical for copper oxalate species. After pPy deposition, the spectrum displayed a coexistence of both copper oxalate (grey marks) and pPy (red marks) peaks. The new pPy-related peaks include C-H out-of-plane deformation ( $493\text{ cm}^{-1}$ ),  $\text{NH}_2^+$  ( $965$  and  $1127\text{ cm}^{-1}$ ), C-H in-plane deformation ( $1047\text{ cm}^{-1}$ ), C-N stretching ( $1217\text{ cm}^{-1}$ ), and C-C/C=C stretching ( $1567\text{ cm}^{-1}$ ), which are characteristic hallmarks for polymerized pPy, distinct from the pyrrole monomer.

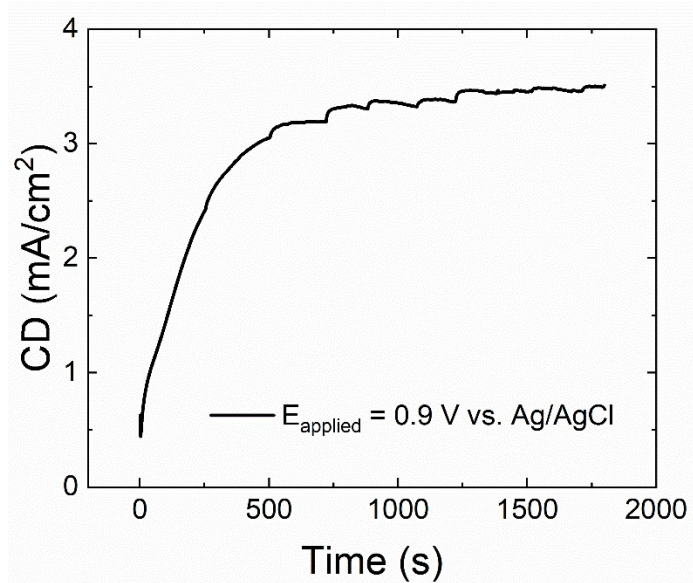

**Figure S9.** Chronoamperogram recorded during a typical experiment where polypyrrole was grown on the surface of a CuOA 3 surface at a constant potential held for varying duration to adjust the total charge passed.

**Figure S9** shows a typical chronoamperogram where the current steadily rises and stabilizes over 30 minutes indicating the growth of a conductive polymer film on top of the copper oxalate coated substrate. Charge passed during the deposition at a typical deposition potential of 0.9V (vs. Ag/AgCl) was used to control the approximate thickness of the pPy layer on top of the copper oxalate sub-layer.



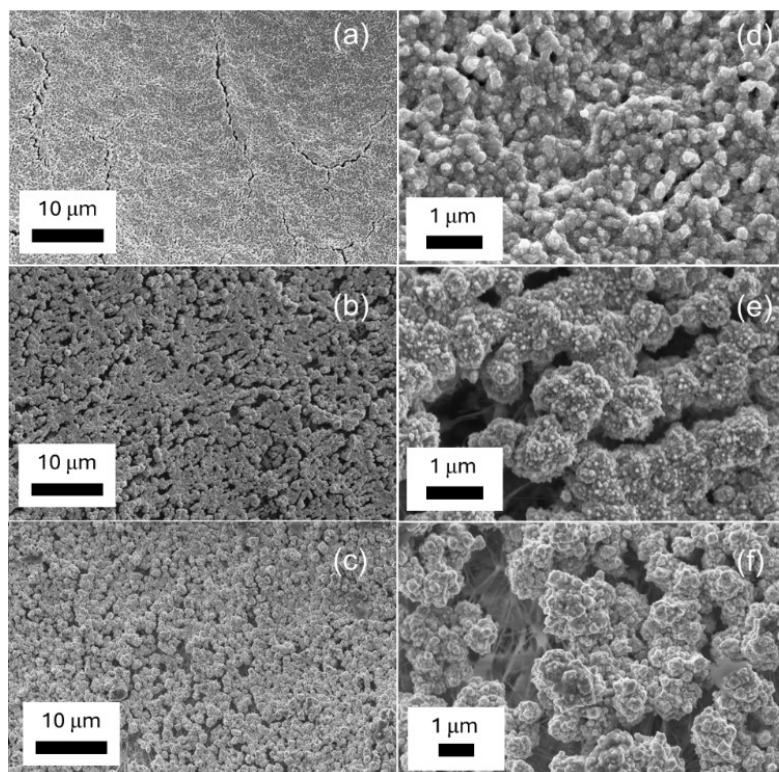

**Figure S10.** SEM images of copper oxalate modified electrodes, CuOA 3 (a, d), CuOA 10 (b, e) and CuOA 50 (c, f) after pre-reduction treatment at low (left column) and high (right) magnification.

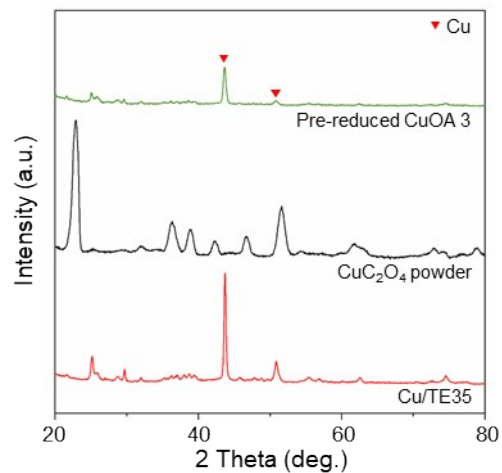

**Figure S11.** XRD patterns of pre-reduced CuOA 3 (oxalate-derived surface), reference  $\text{CuC}_2\text{O}_4$  powder, and Cu/TE35 samples with characteristic Cu (PDF 04-009-2090) and  $\text{CuC}_2\text{O}_4$  (PDF 04-021-4364) peaks indicated.

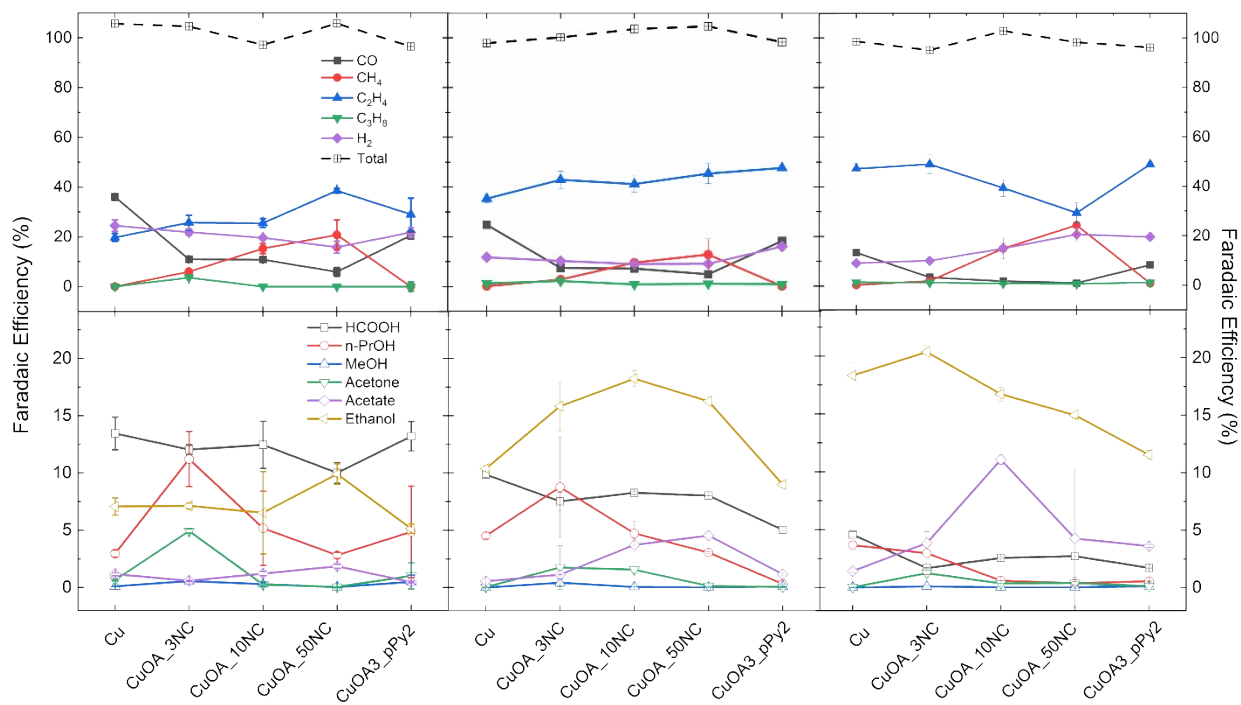

**Figure S12.** Plot of faradaic efficiency for all products generated during galvanostatic CO<sub>2</sub> electrolysis at pristine copper, oxalate-coated copper and polypyrrole coated copper at various current densities. Top row shows all gaseous products, while bottom row shows all liquid phase products.

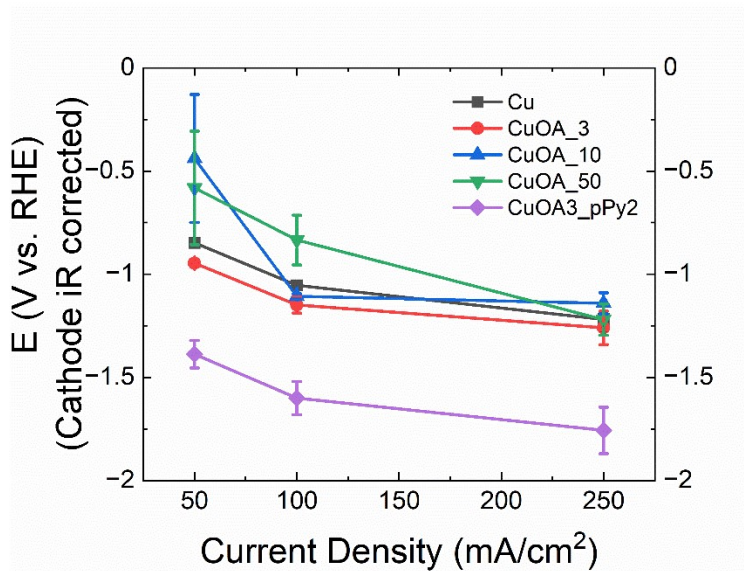

**Figure S13.** Plot of cathode potential (*iR* corrected vs. RHE) as a function of applied current density during galvanostatic reduction of CO<sub>2</sub>.

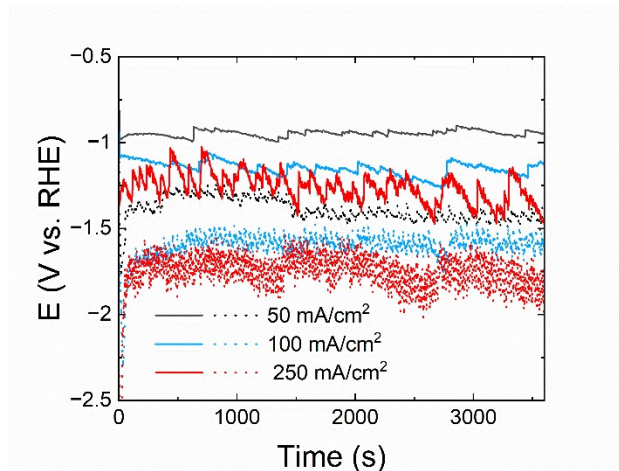

**Figure S14.** Plot of cathode potential (*iR* corrected vs. RHE) as a function of time over the course of a 1hr electrolysis at CuOA 3 (solid lines) and CuOA3\_pPy2 (dotted lines)

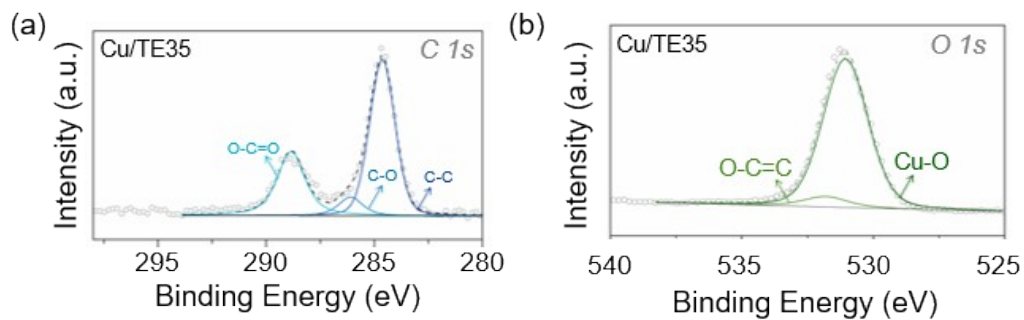

**Figure S15.** High-resolution XPS spectrum of Cu/TE35 GDL in (a) C 1s and (b) O 1s region.

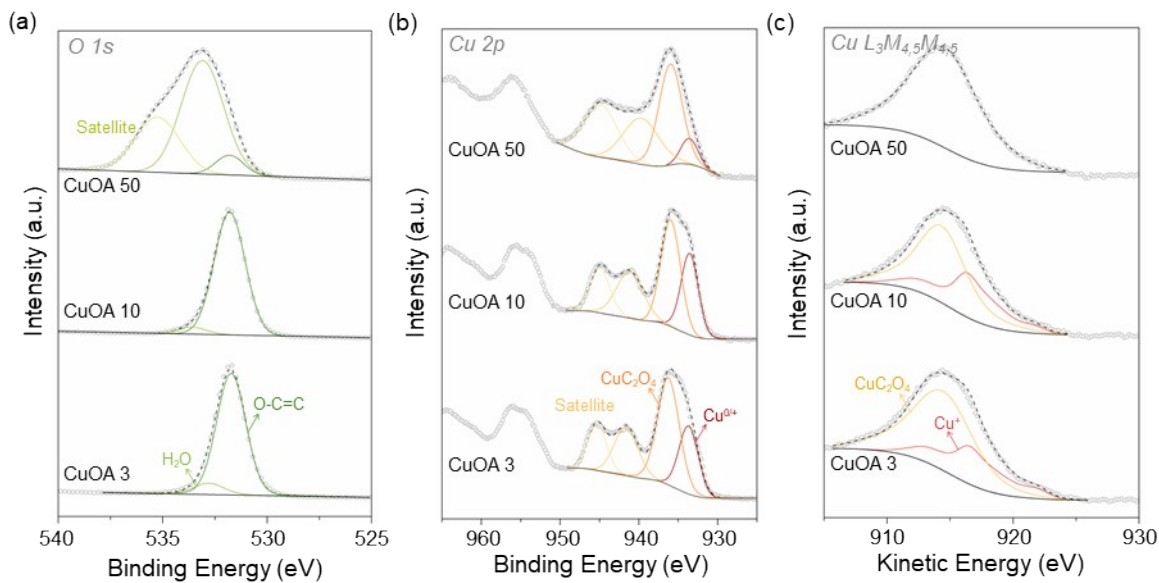

**Figure S16.** High-resolution XPS spectrum of CuOA 3, 10, and 50 samples in (a) O 1s, (b) Cu 2p, and (c) Cu  $L_3M_{4,5}M_{4,5}$  region.

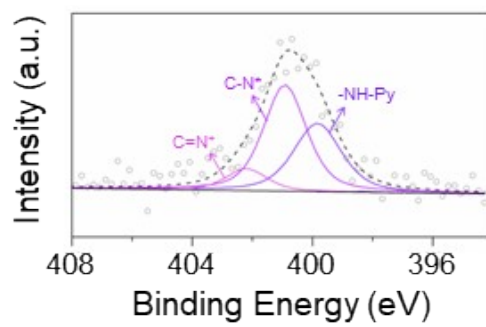

**Figure S17.** *High-resolution XPS spectrum of pristine CuOA3\_pPy0.25 in N 1s region.*

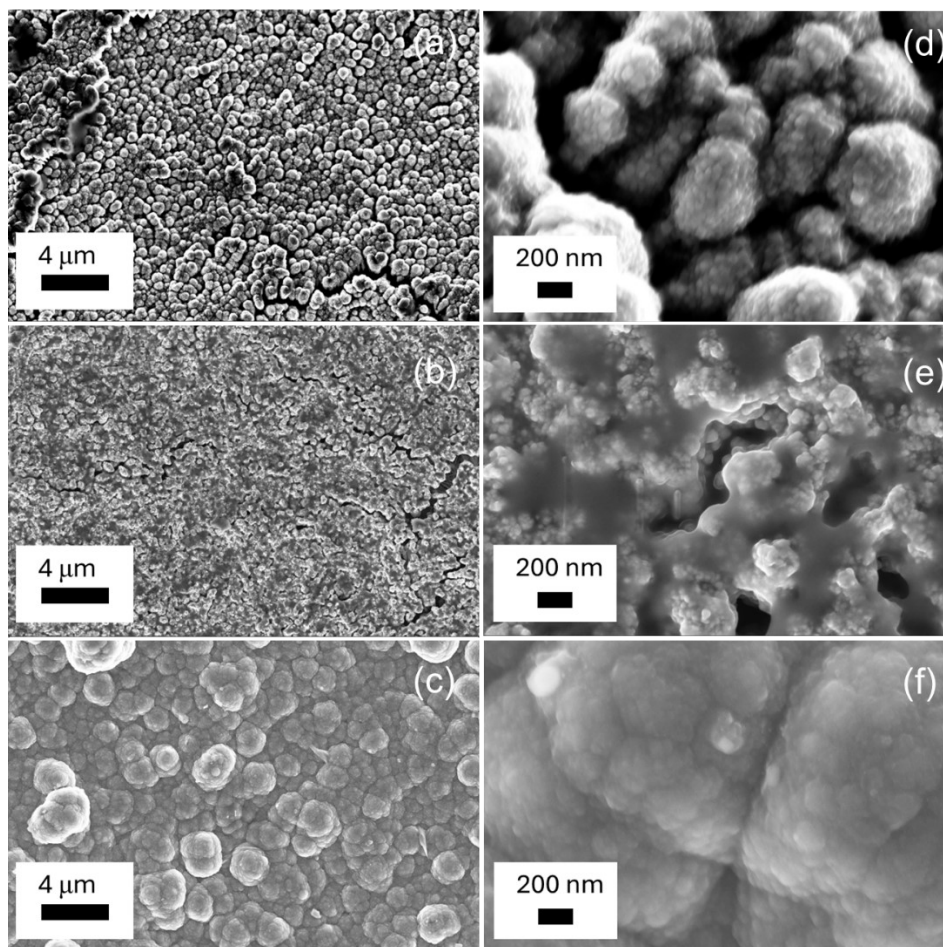

**Figure S18.** SEM images of various cathodes after electrolysis testing, Cu/TE35 (a,d), CuOA 3 (b, e) and CuOA3\_pPy2 (c, f) at low (left column) and high (right) magnification.

*Small amount of salt deposits were also seen on these electrodes which are likely due to residual electrolyte ( $\text{KHCO}_3$ ) used during electrolysis that remains even after rinsing with DI water.*

*Interestingly the polymer coated CuOA3\_pPy2 electrode showed minimal change with a uniform coverage of the polymer visible at both low and high magnifications suggesting that the polymer coating is robust, and imparts stability to the composite cathode, which could extend the usable lifetime of the catalyst.*

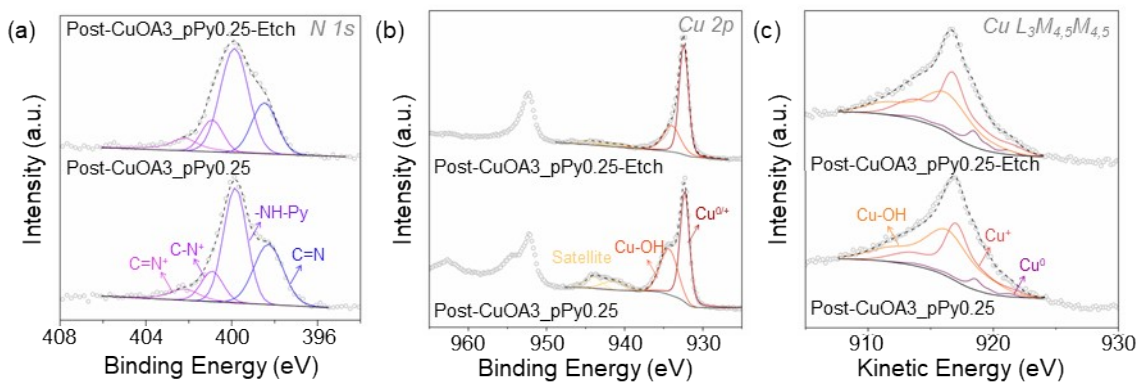

**Figure S19.** High-resolution XPS in (a)  $N\ 1s$ , (b)  $Cu\ 2p$  region and (c)  $Cu\ L_3M_{4,5}M_{4,5}$  Auger spectra of  $CuOA_3\_pPy_{0.25}$  and an etched  $CuOA_3\_pPy_{0.25}$  sample after  $eCO_2RR$ .

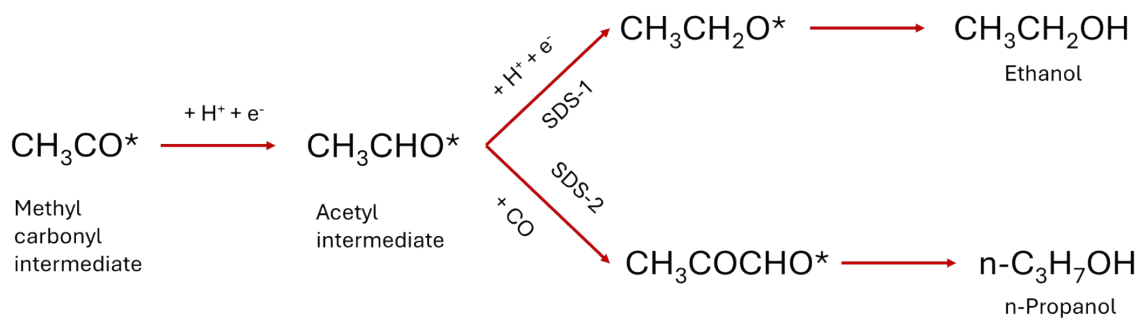

**Figure S20.** Schematic of the reaction pathways starting from the methyl carbonyl intermediate leading to the selectivity determining steps which result in the formation of ethanol and n-propanol as products of eCO<sub>2</sub>RR (Reproduced from<sup>13</sup>)

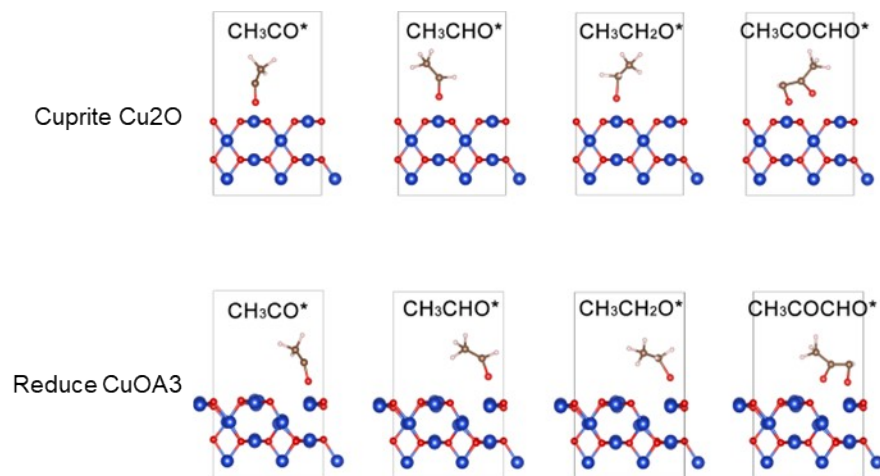

**Figure S21.** Atomic models of reaction intermediates used for  $e\text{CO}_2\text{RR}$  energy barrier calculations on cuprite  $\text{Cu}_2\text{O}$  and reduced  $\text{CuOA}_3$  oxalate-derived surface.

**Table S1.** Comparison of Cu-based catalysts reported in the literature for the eCO<sub>2</sub>RR using a GDE-type flow cell configuration and near neutral pH electrolyte. C<sub>2+</sub> products considered include ethylene, ethanol, ethane, acetate, and n-propanol.

| <b>Catalyst</b>                    | <b>Electrolyte</b>      | <b>Maximum Geometric CD for C<sub>2+</sub> (mA/cm<sup>2</sup>)</b> | <b>Maximum Current Efficiency (CE) for C<sub>2+</sub> (%)</b> | <b>Reference</b> |
|------------------------------------|-------------------------|--------------------------------------------------------------------|---------------------------------------------------------------|------------------|
| Cu/Copper Oxalate (CuOA3)          | 1M KHCO <sub>3</sub>    | 195                                                                | 79                                                            | This work        |
| Cu/Copper Oxalate/pPy (CuOA3_pPy2) | 1M KHCO <sub>3</sub>    | 162                                                                | 65                                                            | This work        |
| Copper (II) Oxide Nanosheets       | 1M KHCO <sub>3</sub>    | 410                                                                | ~59                                                           | 14               |
| Reconstructed Copper               | 1M KHCO <sub>3</sub>    | 347                                                                | 77                                                            | 15               |
| Porous Copper                      | 1M KHCO <sub>3</sub>    | 91                                                                 | ~39                                                           | 16               |
| Cu cubes                           | 1.2 M KHCO <sub>3</sub> | 183                                                                | 61                                                            | 17               |

|                                                       |                              |      |      |    |
|-------------------------------------------------------|------------------------------|------|------|----|
| Cu octahedra                                          | 1.2 M KHCO <sub>3</sub>      | 63   | 32   | 17 |
| Cu nanocrystals                                       | Phosphate buffer<br>(pH 6.4) | 111  | 56   | 18 |
| B-doped CuO                                           | 1M KHCO <sub>3</sub>         | 55   | 62   | 19 |
| Cu <sub>2</sub> O hollow<br>multi shell<br>structures | 0.5 M KHCO <sub>3</sub>      | 514  | 77   | 20 |
| FeTPP[Cl]/Cu                                          | 1M KHCO <sub>3</sub>         | 250  | 82.6 | 21 |
| Cu(100)-rich Cu<br>hollow fiber                       | 0.5 M KHCO <sub>3</sub>      | 1444 | 62.8 | 22 |

**Table S2.** Summary of XRD peak analysis for Cu (111), Cu (200),  $\text{CuC}_2\text{O}_4$  (110), and  $\text{CuC}_2\text{O}_4$  (120), including peak positions and crystalline sizes calculated by Scherrer's equation.

|         | Cu (111)                       |           | Cu (200)                       |           |
|---------|--------------------------------|-----------|--------------------------------|-----------|
|         | 2 Theta                        | Size (nm) | 2 Theta                        | Size (nm) |
| CuOA 50 | -                              | -         | -                              |           |
| CuOA 10 | -                              |           | -                              |           |
| CuOA 3  | 43.36                          | 22.60     | 50.48                          | 13.54     |
| Cu/TE35 | 43.33                          | 18.55     | 50.45                          | 11.70     |
|         | $\text{CuC}_2\text{O}_4$ (110) |           | $\text{CuC}_2\text{O}_4$ (120) |           |
|         | 2 Theta                        | Size (nm) | 2 Theta                        | Size (nm) |
| CuOA 50 | 23.21                          | 33.28     | 36.45                          | 18.28     |
| CuOA 10 | 23.23                          | 33.47     | 36.41                          | 13.81     |
| CuOA 3  | 22.92                          | 23.82     | 36.52                          | 10.23     |

**Table S3.** Atomic composition of Cu/TE35, copper oxalate and polypyrrole on copper-based GDL from XPS survey analysis.

|            | Cu    | C     | O     | N     | Cu:C:O          |
|------------|-------|-------|-------|-------|-----------------|
| Cu/TE35    | 24.18 | 30.42 | 45.4  |       | 1:1.26:1.88     |
| CuOA 3     | 13.46 | 35.83 | 50.71 |       | 1 : 2.66 : 3.77 |
| CuOA 10    | 12.34 | 37.61 | 50.05 |       | 1 : 3.05 : 4.01 |
| CuOA 50    | 10.11 | 42.83 | 47.06 |       | 1 : 4.24 : 4.65 |
| CuOA3_pPy2 | 0     | 66.54 | 21.16 | 12.30 |                 |

**Table S4.** Fitted area percentages of pristine Cu/TE35, copper oxalate and polypyrrole on copper-based GDL from high resolution XPS in Cu 2p<sub>3/2</sub> and Cu LMM region.

| □                  | Cu 2p                           |                     |                   | Cu LMM                          |                     |                 |                 |
|--------------------|---------------------------------|---------------------|-------------------|---------------------------------|---------------------|-----------------|-----------------|
|                    | CuC <sub>2</sub> O <sub>4</sub> | Cu(OH) <sub>2</sub> | Cu <sup>0/+</sup> | CuC <sub>2</sub> O <sub>4</sub> | Cu(OH) <sub>2</sub> | Cu <sup>+</sup> | Cu <sup>0</sup> |
| Cu/TE35            |                                 | 48.33               | 51.67             |                                 | 40.43               | 40.54           | 19.03           |
| CuOA 3             | 64.94                           |                     | 35.06             | 69.44                           |                     | 30.56           |                 |
| CuOA 10            | 58.62                           |                     | 41.38             | 63.51                           |                     | 36.49           |                 |
| CuOA 50            | 84.72                           |                     | 15.28             | 100                             |                     |                 |                 |
| CuOA3_pPy0.25      | 63.40                           |                     | 36.60             | 70.85                           |                     | 24.14           | 5.01            |
| Pre-reduced CuOA 3 |                                 | 14.59               | 85.41             |                                 | 17.56               | 76.89           | 5.55            |

**Table S5.** Fitted area percentages of post-electrolysis Cu/TE35, copper oxalate and polypyrrole on copper-based GDL from high resolution XPS in Cu 2p<sub>3/2</sub> and Cu LMM region.

|                        | Cu 2p               |                   | Cu LMM              |                 |                 |
|------------------------|---------------------|-------------------|---------------------|-----------------|-----------------|
|                        | Cu(OH) <sub>2</sub> | Cu <sup>0/+</sup> | Cu(OH) <sub>2</sub> | Cu <sup>+</sup> | Cu <sup>0</sup> |
| Cu/TE35                | 36.30               | 63.70             | 27.49               | 65.25           | 7.26            |
| CuOA 3                 | 67.30               | 32.70             | 68.01               | 29.56           | 2.44            |
| CuOA3_pPy<br>0.25      | 40.14               | 59.86             | 51.58               | 42.26           | 6.16            |
| CuOA3_pPy<br>0.25-Etch | 31.76               | 68.24             | 42.04               | 49.48           | 8.48            |

## References

- 1 P. Herrasti, A. I. del Rio and J. Recio, *Electrochimica Acta*, 2007, **52**, 6496–6501.
- 2 O. Devos, C. Gabrielli, L. Beitone, C. Mace, E. Ostermann and H. Perrot, *Journal of Electroanalytical Chemistry*, 2007, **606**, 85–94.
- 3 M. J. Higgins, S. T. McGovern and G. G. Wallace, *Langmuir*, 2009, **25**, 3627–3633.
- 4 S. Golba and J. Loskot, *Materials*, 2023, **16**, 7069.
- 5 G. G. McLeod, K. Jeffreys, J. M. R. MacAllister, J. Mundell, S. Affrossman and R. A. Petrick, *Journal of Physics and Chemistry of Solids*, 1987, **48**, 921–926.
- 6 A. J. Welch, A. Q. Fenwick, A. Böhme, H.-Y. Chen, I. Sullivan, X. Li, J. S. DuChene, C. Xiang and H. A. Atwater, *J. Phys. Chem. C*, 2021, **125**, 20896–20904.
- 7 X. Zhao, X. Liu, B. Fan and X. Zheng, *Polymers*, 2022, **14**, 1356.
- 8 H. Khojasteh, K. Heydaryan, P. Aspoukeh, H. N. Ibrahim, M. M. Mohammed, S. M. Sleman and M.-P. Mazhari, *Plasmonics*, 2025, **20**, 803–815.
- 9 A. Sunilkumar, S. Manjunatha, Y. T. Ravikiran, M. Revanasiddappa, M. Prashantkumar and T. Machappa, *Polym. Bull.*, 2022, **79**, 1391–1407.
- 10 A. Dianatdar, M. Miola, O. D. Luca, P. Rudolf, F. Picchioni and R. K. Bose, *J. Mater. Chem. C*, 2022, **10**, 557–570.
- 11 J. Stejskal, J. Vilčáková, M. Jurča, H. Fei, M. Trchová, Z. Kolská, J. Prokeš and I. Křivka, *Coatings*, 2022, **12**, 324.
- 12 H. Liu, G. Cui, L. Li, Z. Zhang, X. Lv and X. Wang, *Nanomaterials*, 2020, **10**, 166.
- 13 Y. Xue, X. Lv, C. Yang, L. Song, L. Zhang and G. Zheng, *Chem. Sci.*, 2025, **16**, 13944–13950.
- 14 X. Wang, K. Klingan, M. Klingenhof, T. Möller, J. Ferreira De Araújo, I. Martens, A. Bagger, S. Jiang, J. Rossmeisl, H. Dau and P. Strasser, *Nat Commun*, 2021, **12**, 794.
- 15 J. Lv, M. Jouny, W. Luc, W. Zhu, J. Zhu and F. Jiao, *Advanced Materials*, 2018, **30**, 1803111.

- 16 M. G. Kibria, C. Dinh, A. Seifitokaldani, P. De Luna, T. Burdyny, R. Quintero-Bermudez, M. B. Ross, O. S. Bushuyev, F. P. García De Arquer, P. Yang, D. Sinton and E. H. Sargent, *Advanced Materials*, 2018, **30**, 1804867.
- 17 G. L. De Gregorio, T. Burdyny, A. Loiudice, P. Iyengar, W. A. Smith and R. Buonsanti, *ACS Catal.*, 2020, **10**, 4854–4862.
- 18 H. S. Jeon, J. Timoshenko, C. Rettenmaier, A. Herzog, A. Yoon, S. W. Chee, S. Oener, U. Hejral, F. T. Haase and B. Roldan Cuenya, *J. Am. Chem. Soc.*, 2021, **143**, 7578–7587.
- 19 K. K. Patra, S. Park, H. Song, B. Kim, W. Kim and J. Oh, *ACS Appl. Energy Mater.*, 2020, **3**, 11343–11349.
- 20 C. Liu, M. Zhang, J. Li, W. Xue, T. Zheng, C. Xia and J. Zeng, *Angewandte Chemie International Edition*, 2022, **61**, e202113498.
- 21 F. Li, Y. C. Li, Z. Wang, J. Li, D.-H. Nam, Y. Lum, M. Luo, X. Wang, A. Ozden, S.-F. Hung, B. Chen, Y. Wang, J. Wicks, Y. Xu, Y. Li, C. M. Gabardo, C.-T. Dinh, Y. Wang, T.-T. Zhuang, D. Sinton and E. H. Sargent, *Nature Catalysis*, 2020, **3**, 75–82.
- 22 C. Zhu, Y. Song, X. Dong, G. Li, A. Chen, W. Chen, G. Wu, S. Li, W. Wei and Y. Sun, *Energy Environ. Sci.*, 2022, **15**, 5391–5404.
